# Supplementary material for: Repurposing Treatment of Wernicke–Korsakoff Syndrome for Th-17 Cell Immune Storm Syndrome and Neurological Symptoms in COVID-19: Thiamine Efficacy and Safety, In-Vitro Evidence and Pharmacokinetic Profile
Source: PubMed Central journal article supplement (PMC7960760; doi:10.3389/fphar.2020.598128), 2021-03-02
Supplement: datasheet1.pdf [file datasheet1.pdf]

## Supplementary Section

### Results

#### *Experimental Model for Treatment Efficacy of Thiamine on IL-17 and IL-22 Activity*

Using these clinical findings of the treatment efficacy of thiamine, we designed an *invitro* experiment using mouse macrophage RAW264.7 cells to validate the effects of thiamine on alcohol-induced IL-17 and IL-22 expression. The results showed that a low dose of thiamine ( $V_{B1}$ ) decreased IL-17 expression in the absence (by 20% approximately) and/or presence of alcohol treatment (by 25% roughly) (Supple Figure 1a). Importantly, IL-22 expression was upregulated by thiamine in both the control and ethanol-treated cells. This response in IL-22 expression was moderately reduced by alcohol but rescued by the thiamine ( $V_{B1}$ ) treatment (Supple. Figure 1b). Half of the treatment dose ( $0.02 \mu\text{g/mL}$ ) that was found to be effective in humans was beneficial as a preventative dose ( $0.01 \mu\text{g/mL}$ ) of thiamine in this *in vitro* model.

**Suppl Table 1.** Presentation of demographic and candidate proinflammatory cytokines in the study participants.

| Measures                                     | Disease Controls<br>(n=16) | Healthy Controls<br>(n=8) | Comments |
|----------------------------------------------|----------------------------|---------------------------|----------|
| Age (yrs.)                                   | 41.87±11.04                | 28.38±4.44                | 0.002    |
| Sex (F/M), in number                         | F=4/M=12                   | F=2/M=6                   | NA       |
| BMI (units)                                  | 27.11±6.14                 | 24.65±3.328               | NS       |
| Candidate Cytokines observed in immune storm |                            |                           |          |
| IL-6 (pg/ml)                                 | 2.478±1.37                 | 0.406±0.20                | ≤0.001   |
| IL-10 (pg/ml)                                | 0.335±0.17                 | 0.285±0.12                | NS       |
| IL-1β (pg/ml)                                | 0.598±0.30                 | 0.219±0.40                | 0.017    |

Footnote - yrs.: years; F: Females; M: Males; BMI: Body Mass index; IL: Interleukin;  $\beta$ : beta; pg: picogram; ml: milliliter; NA: Not Applicable; NS: Not significant.

**Suppl Table 2.** Area Under the Curve (AUC), and maximum or peak concentration ( $C_{max}$ ) derived for the low and high doses of thiamine (Vit B1).

| Vit B1 Dose      | 79 mg  | 474 mg |
|------------------|--------|--------|
| Blood AUC        | 169.06 | 483.48 |
| Plasma AUC       | 139.04 | 516.66 |
| CL               | 56%    | 91%    |
| Blood $C_{max}$  | 31.6   | 66.36  |
| Plasma $C_{max}$ | 30.81  | 85.32  |

Footnote - Unit for AUC: nmol/Liter x Hours for 10 Hrs.; CL: Clearance; Unit for  $C_{max}$ : nmol/Liter; AUC: Area Under the Curve;  $C_{max}$ : Peak Concentration of Drug in Specific Body System/ Organ. Vit B1: Thiamine; mg: milligram.

**Supplement Figure 1 legend:** mRNA expression of IL-17 and IL-22 in an *invitro* model of the mouse macrophage cell line using a potent proinflammatory agent (alcohol), and preventative administration of thiamine. SFig. 1a: Significant lowering was observed in IL-17 mRNA

expression in “EtOH + V<sub>B1</sub>” (Bar 4) group compared to the alcohol-treated group (Bar 3). SFig. 1b: Significant elevation was observed in IL-22 mRNA expression in “EtOH + V<sub>B1</sub>” (Bar 4) group compared to the alcohol-treated group (Bar 3). Controls (both SFig. 1a and 1b) show normal anti-inflammatory effects of thiamine on IL-17 and IL-22 response with thiamine administration. Ctrl: Non-treated controls. V<sub>B1</sub> 0.01 ug/ml. EtOH: alcohol treated. V<sub>B1</sub>+E: thiamine and alcohol treated. Data are presented as M±SD. Statistical significance was set as p < 0.05.
